# Supplementary material for: Meta-analysis derived atopic dermatitis (MADAD) transcriptome defines a robust AD signature highlighting the involvement of atherosclerosis and lipid metabolism pathways
Source: BMC Med Genomics. 2015 Oct 12;8:60. doi: 10.1186/s12920-015-0133-x (PMC4603338; doi:10.1186/s12920-015-0133-x)
Supplement: Supplementary file 5 — Consensus of re-analyized included datasets (by Probes). (XLSX 60 kb) [file 12920_2015_133_MOESM5_ESM.xlsx]

## Sheet: consensus_all.csv
Table E2	Consensus of re-analyized included datasets (by Probes)
PROBEID	ENTREZID	SYMBOL	OMIM	CHRLOCCHR	GENENAME	PATH
1554406_a_at	64581	CLEC7A	606264	12	C-type lectin domain family 7, member A	4145
1555756_a_at	64581	CLEC7A	606264	12	C-type lectin domain family 7, member A	4145
203233_at	3566	IL4R	147050	16	interleukin 4 receptor	04060 | 04630 | 04640
203779_s_at	10205	MPZL2	604873	11	myelin protein zero-like 2
204420_at	8061	FOSL1	136515	11	FOS-like antigen 1	04310 | 04380
205660_at	8638	OASL	603281	12	2'-5'-oligoadenylate synthetase-like
206561_s_at	57016	AKR1B10	604707	7	aldo-keto reductase family 1, member B10 (aldose reductase)	00051 | 00591 | 00650 | 01100
206932_at	9023	CH25H	604551	10	cholesterol 25-hydroxylase	120
207356_at	1673	DEFB4A	602215	8	defensin, beta 4A | defensin, beta 4B
209642_at	699	BUB1	602452	2	BUB1 mitotic checkpoint serine/threonine kinase	04110 | 04114 | 04914
209959_at	8013	NR4A3	600542	9	nuclear receptor subfamily 4, group A, member 3
210652_s_at	22996	TTC39A		1	tetratricopeptide repeat domain 39A
216258_s_at	5275	SERPINB13	604445	18	serpin peptidase inhibitor, clade B (ovalbumin), member 13	5146
218960_at	56649	TMPRSS4	606565	11	transmembrane protease, serine 4
219836_at	79413	ZBED2	615246	3	zinc finger, BED-type containing 2
219918_s_at	259266	ASPM	605481	1	asp (abnormal spindle) homolog, microcephaly associated (Drosophila)
220658_s_at	56938	ARNTL2	614517	12	aryl hydrocarbon receptor nuclear translocator-like 2
220941_s_at	54149	C21orf91		21	chromosome 21 open reading frame 91
224204_x_at	56938	ARNTL2	614517	12	aryl hydrocarbon receptor nuclear translocator-like 2
224917_at	81671	VMP1	611753	17	vacuole membrane protein 1 | microRNA 21
227211_at	26147	PHF19	609740	9	PHD finger protein 19
231033_at
231697_s_at	81671	VMP1	611753	17	vacuole membrane protein 1
243754_at
244697_at
